# Supplementary material for: A BTP1 prophage gene present in invasive non-typhoidal Salmonella determines composition and length of the O-antigen of the lipopolysaccharide
Source: PubMed Central journal article supplement (PMC4413052; doi:10.1111/mmi.12933), 2015-02-11
Supplement: mmi0096-0263-sd1.pdf [file mmi0096-0263-sd1.pdf]

**Table S1** Oligonucleotides used in this study

| <b>oMV number</b> | <b>SEQUENCE (5' TO 3')*</b>                                                               | <b>Description</b>                                                         |
|-------------------|-------------------------------------------------------------------------------------------|----------------------------------------------------------------------------|
| oMV413            | GGTAGCTCTGCAGCTTCGCATTACGAATTATAAGAAC                                                     | PstI site; Fd primer BTP1 regulatory region for cloning into CRIM          |
| oMV439            | TATTTCCGTAATATTCTCATTTGTCCTCGCCCCTGTTCT<br>AACGTCCCATGT <i>GTGTAGGCTGGAGCTGCTTC</i>       | Fam 3 gtrC end + pKD13                                                     |
| oMV441            | TTGTCCCAAACACTACTTAGCAATCAGTAGCCCCAATTGA<br>TCGGTAACAACG <i>ATTCCGGGGATCCGTCGACC</i>      | Fam 3 regulatory region + pKD13                                            |
| oMV442            | AATTGCTGTAATTTACCTTTGTCTACAGAAGCGTAGT<br>ACCAGAATTCAT <i>GTGTAGGCTGGAGCTGCTTC</i>         | Fam 4 gtrC end + pKD13                                                     |
| oMV444            | ATTAGTCCCTTTTCGCGCGCTATTTCCGATGAAAATGT<br>AATCACTTTGCG <i>ATTCCGGGGATCCGTCGACC</i>        | Fam 4 regulatory region + pKD13                                            |
| oMV466            | TTAAGACCCACTTTACATT                                                                       | tetR amplification for insertion into pCP20                                |
| oMV467            | CTAAGCACTTGTCTCCTG                                                                        | tetA amplification for insertion into pCP20                                |
| oMV483            | CTTAATTTGCTCTTGTGTGGCACCTTGAATTATAGGT<br>AAAAAATGATCTACAAG <i>TTAAGACCCACTTTACATT</i>     | oafA start + tetR                                                          |
| oMV484            | TTTTGAAATCTGCTTTTTCACTTCCTCAATAAACCC<br>TGAGCCTTCTGG <i>CTAAGCACTTGTCTCCTG</i>            | oafA end + tetA                                                            |
| oMV487            | TGTGGCACCTTGAATTATAGGTAAAAAATGATCTAC<br>AAGCCAGAAGGCTCAGGGTGGTTTATTGAGGAAGTG<br>AAAAAGCAG | Replacement oligo for above                                                |
| oMV496            | TATTTCCGTAATATTCTCATTTGTCCTCGCCCCTGTTCT<br>AACGTCCCATGT <i>TTAAGACCCACTTTACATT</i>        | Fam 3 gtrC end + tetR                                                      |
| oMV497            | TTGTCCCAAACACTACTTAGCAATCAGTAGCCCCAATTGA<br>TCGGTAACAACG <i>CTAAGCACTTGTCTCCTG</i>        | Fam 3 regulatory region + tetA                                             |
| oMV754            | ACATGGGTGACAAGCACCCATGTAAATTTATCTTATTA<br>TCAAATG <i>TTAAGACCCACTTTACATT</i>              | BTP1 gtrC end + tetR                                                       |
| oMV755            | ACGTAATCTGCTGCTGGCGATGGGAATTCATGATGC<br>ACATCCG <i>CTAAGCACTTGTCTCCTG</i>                 | BTP1 reg region + tetA                                                     |
| oMV758            | GCTGCTGGCGATGGGAATTCATGATGCACATCCGCA<br>TTTGATAATAAGATAAATTTACATGGGTGCTTG                 | Replacement oligo for above                                                |
| oMV776            | TACTATAGATCTATGTTGAAGTTATTCGCTAAGTAC                                                      | BglII; P22 gtrA start                                                      |
| oMV777            | TACTATAGATCTGTGAAATTAATAGTAATGACAGG                                                       | BglII; P22 gtrC end                                                        |
| oMV780            | ATTAGTGAATTCCTATTTGATTATTTTATTTCCG                                                        | EcoRI; SEN-F2 gtrC end                                                     |
| oMV871            | ACATGGGTGACAAGCACCCATGTAAATTTATCTTATTA<br>TCAAATG <i>GTGTAGGCTGGAGCTGCTTC</i>             | gtrC(402-640) <sup>BTP</sup> + pKD13 (Rv)                                  |
| oMV875            | CATGATGGTACCCTTTAACATGATAAAAAGTCAGTGA                                                     | Acc651 site: Rv primer BTP1 regulatory region for cloning into CRIM vector |
| oMV894            | TATGCTACTCTGTGCTGTTAAAAGATGCCATATCTAAT<br>GGTTGCA <i>ATTCCGGGGATCCGTCGACC</i>             | gtrC(402-640) <sup>BTP</sup> + pKD13 (Fd)                                  |
| oMV897            | TACTATATCGATGATAAGCTGTCAAACATGATTATCTT                                                    | Clal; BTP1 gtrC end                                                        |

|         |                                                                            |                                                                                                   |
|---------|----------------------------------------------------------------------------|---------------------------------------------------------------------------------------------------|
|         | ATTATCAAATGCCCTA                                                           |                                                                                                   |
| oMV898  | TACTATAGATCTGTTAACTAGAGGTAGTTTAAG                                          | BglII; extended start site BTP1 gtrC                                                              |
| oMV958  | <u>CTACTTGTCGTCATCGTCCTTGTAGTCTCTTATTATCAA</u><br>ATGCCCTA                 | Introduces C-terminal FLAG sequence onto gtrC C-terminus                                          |
| oMV959  | CTATATCGATGATAAGCTGTCAAACATGACTA<br>CTTGTCGTCATC                           | Introduces ClaI site for cloning into pLAC22 vector; to be used with oMV958 for cloning gtrC-FLAG |
| oMV989  | CACTGTCTCCAGCTTCATCCTTTTTTTAGTTAGGGTATC<br>TT <i>GTAGGCTGGAGCTGCTTCG</i>   | wzz pKD4 vector Fd                                                                                |
| oMV990  | ATTTTACCTGTCGTAGCCGACCACCATCCGGCAAAGA<br>AGC <i>CATATGAATATCCTCCTTAG</i>   | wzz pKD4 vector Rv                                                                                |
| oMV954  | GAATTTTACAAGAGAG <b>CA</b> ATACTAG <b>CA</b> AATATCCCAG<br>CT              | SDM** of gtrC <sup>BTP</sup>                                                                      |
| oMV955  | AGCTGGGAATATT <b>G</b> CTAGTATT <b>G</b> CTCTCTTGAAAATT<br>C               | SDM of gtrC <sup>BTP</sup>                                                                        |
| oMV993  | CATGGT <u>CGACG</u> CCCCAACAAAACCACCAGG                                    | Sall site- aa37 BTP1 gtrC                                                                         |
| oMV994  | CATGGT <u>CGACG</u> CCGATTTTAATATAATAGA                                    | Sall site- aa56 BTP1 gtrC                                                                         |
| oMV995  | CATGGT <u>CGACG</u> CGAATATTCTTAGTATTCT                                    | Sall site- aa76 BTP1 gtrC                                                                         |
| oMV996  | CATGGT <u>CGACG</u> CAATTCATTCATGGAGTA                                     | Sall site- aa370 BTP1 gtrC                                                                        |
| oMV997  | CATGGT <u>CGACG</u> CTCTTATTATCAAATGCCC                                    | Sall site- aa640 BTP1 gtrC                                                                        |
| oMV1003 | CATGAAGCTTATTAATGCAGCTGGCACGAC                                             | HindIII; gtrC Fd for cloning into pSK4158 (with oMV993-997)                                       |
| oMV1006 | CGTTGGGTGATCTTTTTCGT                                                       | phoA reverse primer to screen inserts in pSK4158                                                  |
| oMV1037 | AGTTTTGTATTGTGCGCCTTGCTGTACCAGGAGCA<br>CAGTAA <i>TTGAGCGATTGTGTAGGCTG</i>  | TSP + pKD13 Fd                                                                                    |
| oMV1038 | TAAATTTACATGGGTGCTTGTCACCCATGTTTTACAAT<br>ATCA <i>TGATAAGCTGTCAAACATGA</i> | TSP + pKD13 Rv                                                                                    |

\* Restriction sites are underlined; homology with resistance cassettes are in italics

\*SDM = site-directed mutagenesis. Codons creating mutations are in bold.
